# Supplementary material for: A quadruple-label time-resolved fluorescence immunochromatographic assay for simultaneous quantitative determination of three mycotoxins in grains
Source: Royal Society of Chemistry journal article supplement (doi:10.1039/c9ay02309g), 2019-11-27
Supplement: c9ay02309g1.pdf [file c9ay02309g1.pdf]

## Supplementary material

### **A quadruple-label time-resolved fluorescent immunochromatographic assay for simultaneous quantitative determination of three mycotoxins in grains**

Xiaoxi Chang <sup>1a</sup>, Yaqing Zhang <sup>1a</sup>, Hebing Liu <sup>2</sup>, Xiaoqi Tao <sup>1,31</sup>

1 College of Food Science, Southwest University, Chongqing, 400715, China

2 Beijing WDWK Biotech Co., Ltd, Beijing, 100095, China

3 Key Laboratory of Luminescence and Real-Time Analytical Chemistry, Ministry of  
Education, Southwest University, Chongqing, 400715, China

---

<sup>1</sup>Address correspondence to Xiaoqi Tao, College of Food Science, Southwest University, NO. 2 Tiansheng Road,

Beibei District, Chongqing, 400715, China. E-mail: 77179000@qq.com. [Tel:+86-18306008102](tel:+86-18306008102)

<sup>a</sup>These authors contributed equally to this work and should be considered co-first authors.

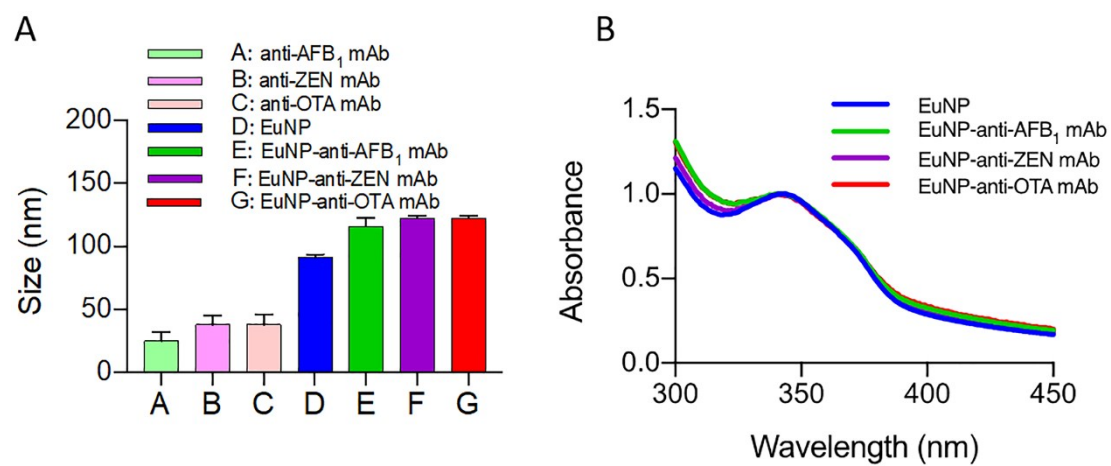

Figure S1. A) Particle size and B) UV absorption spectra for EuNP and three probes

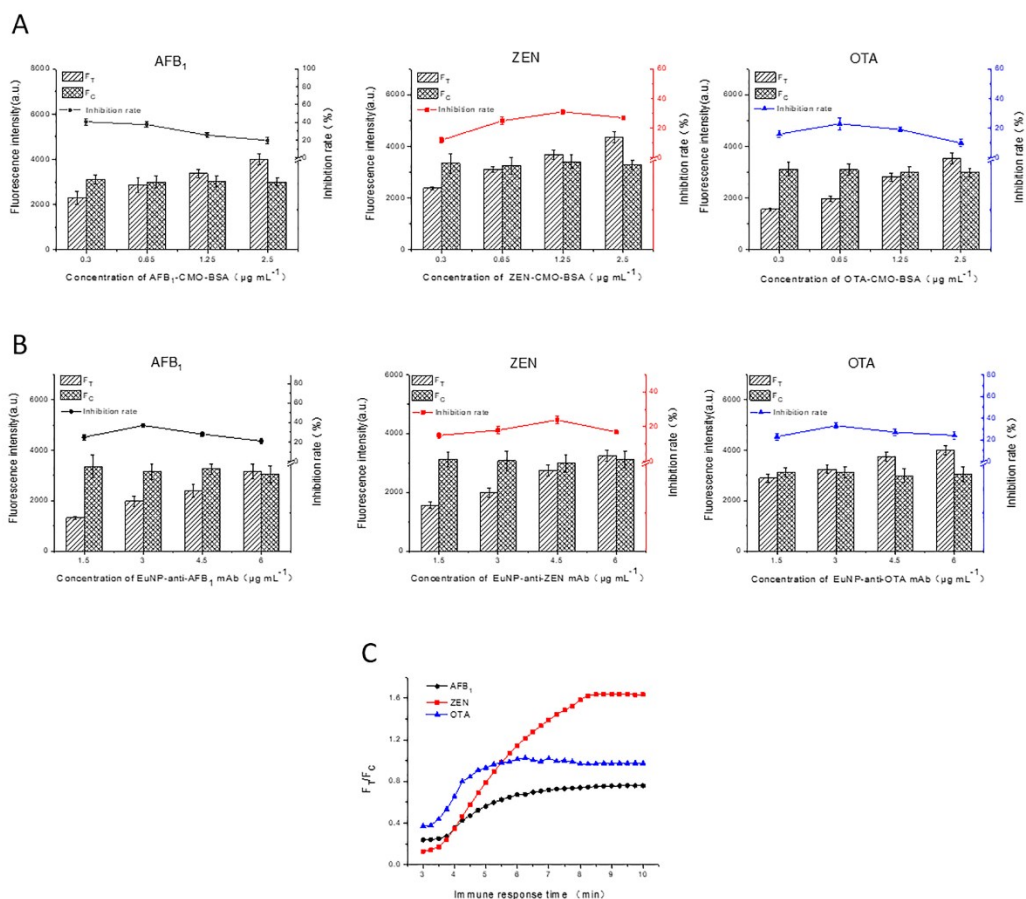

Figure S2 Optimization of the concentration of A) antigen ( $\mu\text{g mL}^{-1}$ ) and B) immunoprobe ( $\mu\text{g mL}^{-1}$ ). C) Immunodynamic curve (min)

Table S1 Maximum residue limits for AFB<sub>1</sub>, ZEN and OTA in foods in China, USA and the EU

|                     | AFB <sub>1</sub>                                                                                                            | ZEN                                                  | OTA                                                 |
|---------------------|-----------------------------------------------------------------------------------------------------------------------------|------------------------------------------------------|-----------------------------------------------------|
| China <sup>10</sup> | 5 µg kg <sup>-1</sup> in wheat, barley and their products, while 20 µg kg <sup>-1</sup> in corn, cornmeal and corn products | 60 µg kg <sup>-1</sup> in wheat and corn             | 5 µg kg <sup>-1</sup> in cereals and their products |
| FDA <sup>11</sup>   | 20 µg kg <sup>-1</sup> in general sample                                                                                    | Not specified                                        | Not specified                                       |
| EU <sup>12</sup>    | 2 µg kg <sup>-1</sup> in cereals and their products                                                                         | 75 µg kg <sup>-1</sup> in cereals and their products | 3 µg kg <sup>-1</sup> in cereals and their products |

Table S2 Cross-reaction rate of AFB<sub>1</sub>, ZEN and OTA measured by QL-TRFICA

| Target substance | AFB <sub>1</sub> | AFB <sub>2</sub> | AFM <sub>1</sub> | AFM <sub>2</sub> | AFG <sub>1</sub> | AFG <sub>2</sub> | OTA   | OTB   |
|------------------|------------------|------------------|------------------|------------------|------------------|------------------|-------|-------|
| CR (%)           | 100              | 18.11            | 11.90            | 1.47             | 5.43             | 4.98             | 100   | 21.73 |
| Target substance | ZEN              | ZAN              | $\alpha$ -ZOL    | $\beta$ -ZOL     | $\alpha$ -ZAL    | $\beta$ -ZAL     | DON   | T-2   |
| CR (%)           | 100              | 19.34            | 17.62            | 12.96            | 16.51            | 11.02            | <0.01 | <0.01 |
